# Supplementary material for: Alteration, mass analysis, and magmatic compositions of the Sentinel Bluffs Member, Columbia River flood basalt province
Source: Oxford University Press journal article supplement (doi:10.1130/ges01188.1), 2017-12-07
Supplement: ges01188_suppfile4.xlsx [file ges01188_suppfile4.xlsx]

## Sheet: MI calc
	coords. for MI100_est			MI window		calculation			Diff MI100_regr & MIs100_calc				Summary
	TiO2	Al2O3		0.5		1			diff_slope	diff_int			total samples in regression	34
	1.7	14.2		0.25					0	0			samples in MI window with MI > 100	18
	2.2	13.4											samples in MI window with MI < 100	16
													max. MIs in regression	100.25
	MI100_est				MIs_calc				MI100_regr				min. MIsin regression	99.7664
	slope	intercept			slope	intercept			slope	intercept
	-1.6	16.92			-1.6292	17.0329			-1.6292	17.0329			samples with MI > (100+MI win.)	1
													max. MIs	100.357
	Sample ID	Unit ID	TiO2n	Al2O3n	TiO2_MI100	Al2O3_MI100	MIs	in MI window	TiO2n in MI win	Al2O3n in MI win	MIs_win	Al2O3/TiO2
	10MS173	1	2.05225	13.7689	2.04271	13.7049	99.5353					6.70917
	10MS071	1	2.07645	13.6495	2.0765	13.6499	100.002	OK	2.07645	13.6495	100.002	6.57348
	10MS079	1	2.07917	13.669	2.07631	13.6502	99.8624	OK	2.07917	13.669	99.8624	6.57427
	10MS174	1	1.96568	13.8521	1.96317	13.8345	99.8727	OK	1.96568	13.8521	99.8727	7.04701
	10MS175	1	1.95553	13.8459	1.95564	13.8468	100.006	OK	1.95553	13.8459	100.006	7.08041
	10MS178	1	1.95455	13.8942	1.94933	13.8571	99.7327					7.10863
	10MS259	1	1.95512	13.8935	1.94988	13.8562	99.7315					7.10618
	07MS023	1	2.0424	14.4654	1.95517	13.8475	95.7287					7.08254
	10MS072	1	2.02436	13.7145	2.02677	13.7309	100.119	OK	2.02436	13.7145	100.119	6.77475
	10MS080	1	2.01863	13.7035	2.02346	13.7363	100.239	OK	2.01863	13.7035	100.239	6.78851
	10MS104	1	1.97997	13.7766	1.98352	13.8013	100.179	OK	1.97997	13.7766	100.179	6.958
	10MS114	1	2.00078	13.7986	1.9978	13.7781	99.8512	OK	2.00078	13.7986	99.8512	6.89661
	10MS283	1	1.98432	13.7576	1.98928	13.792	100.25	OK	1.98432	13.7576	100.25	6.93317
	08MS018	1	1.92757	14.1446	1.89946	13.9383	98.5416					7.33805
	10MS042	1	1.94942	14.4396	1.88493	13.962	96.692					7.40714
	10MS043	1	1.92344	14.3693	1.87179	13.9834	97.3146					7.47061
	08MS019	1	1.95542	14.1078	1.92594	13.8952	98.4926					7.21474
	10MS176	2	2.04486	13.75	2.03904	13.7109	99.7157					6.72418
	10MS177	2	2.04153	13.7368	2.03795	13.7127	99.8247	OK	2.04153	13.7368	99.8247	6.72865
	10MS258	2	2.02521	13.7522	2.02298	13.7371	99.8898	OK	2.02521	13.7522	99.8898	6.79052
	10MS179	2	1.97061	13.8988	1.96181	13.8367	99.5534					7.05303
	10MS180	2	1.99211	13.8303	1.9871	13.7955	99.7488					6.94253
	10MS260	2	1.98006	13.8207	1.97846	13.8096	99.9194	OK	1.98006	13.8207	99.9194	6.97996
	10MS147	2	2.03466	14.0016	2.00134	13.7723	98.3624					6.88155
	10MS320	2	2.02711	14.0239	1.99277	13.7863	98.3057					6.91817
	97SH-X49A	2	1.97078	13.7992	1.97343	13.8178	100.135	OK	1.97078	13.7992	100.135	7.0019
	10MS139	2	1.92575	13.9329	1.92153	13.9024	99.781	OK	1.92575	13.9329	99.781	7.23505
	10MS310	2	1.9246	13.922	1.92181	13.9019	99.8554	OK	1.9246	13.922	99.8554	7.23373
	10MS140	3	1.93721	13.8748	1.93744	13.8764	100.011	OK	1.93721	13.8748	100.011	7.16227
	10MS311	3	1.94621	13.8521	1.94736	13.8603	100.059	OK	1.94621	13.8521	100.059	7.11747
	10MS312	3	1.94356	13.93	1.93634	13.8782	99.6286					7.16724
	07MS009	3	2.18354	15.1652	1.98647	13.7966	90.9748					6.94527
	07MS010	3	3.70684	25.9672	1.97268	13.819	53.2172					7.00522
	07MS012	3	2.14302	15.0155	1.97234	13.8196	92.0356					7.00669
	07MS014	3	2.06719	14.2268	2.00119	13.7726	96.807					6.8822
	07MS013	3	2.00611	13.9656	1.98271	13.8027	98.8337					6.96151
	07MS011	3	2.00518	13.9022	1.98928	13.792	99.2073					6.93314
	07MS022	3	2.02252	14.0062	1.99114	13.7889	98.4487					6.92515
	07MS021	3	2.02666	14.0286	1.99187	13.7878	98.283					6.92203
	07MS016	3	1.98577	13.8047	1.98496	13.799	99.9592	OK	1.98577	13.8047	99.9592	6.9518
	07MS015	3	1.95736	13.8305	1.95891	13.8415	100.079	OK	1.95736	13.8305	100.079	7.0659
	99SH-X98	3	1.98466	13.8943	1.97367	13.8174	99.4464					7.00088
	00SH-X111	3	1.98795	13.8905	1.97677	13.8124	99.4374					6.98734
	10MS201	3	2.00381	13.8657	1.99242	13.7869	99.4314					6.91967
	10MS215	3	2.09905	14.5125	1.99377	13.7847	94.9844					6.91386
	07RW006	3	1.97799	13.7848	1.98096	13.8055	100.15	OK	1.97799	13.7848	100.15	6.96911
	07RW012	3	2.04475	14.2339	1.98278	13.8026	96.9695					6.96122
	10MS181	3	1.8768	14.0072	1.87328	13.981	99.8128	OK	1.8768	14.0072	99.8128	7.46334
	10MS261	3	1.88248	14.0881	1.86908	13.9878	99.2882					7.48381
	10MS262	3	1.88126	14.0703	1.87002	13.9863	99.403					7.47919
	10MS182	3	1.88331	14.0252	1.87663	13.9755	99.6456					7.4471
	10MS263	3	1.88372	14.036	1.87579	13.9769	99.5788					7.4512
	10MS141	3	1.87836	13.9924	1.87619	13.9762	99.8844	OK	1.87836	13.9924	99.8844	7.44927
	10MS313	3	1.89193	14.0165	1.88463	13.9625	99.6143					7.4086
	10MS073	3	1.87564	13.9508	1.87855	13.9724	100.155	OK	1.87564	13.9508	100.155	7.43787
	10MS331	3	1.87908	13.9437	1.88215	13.9665	100.164	OK	1.87908	13.9437	100.164	7.42049
	10MS105	3	1.90271	14.0068	1.89451	13.9464	99.5688					7.36149
	10MS113	3	1.91431	14.0886	1.8949	13.9457	98.986					7.35962
	10MS284	3	1.89472	14.0119	1.88742	13.9579	99.6146					7.39525
	10MS293	3	1.92805	13.99	1.917	13.9097	99.4265					7.25601
	07RW004	3	1.9144	13.9708	1.90803	13.9243	99.6673					7.29777
	10MS244	3	1.86641	14.032	1.86205	13.9993	99.7664	OK	1.86641	14.032	99.7664	7.51822
	10MS248	3	1.86661	13.995	1.86627	13.9924	99.9816	OK	1.86661	13.995	99.9816	7.49753
	10MS027	3	1.87709	14.1204	1.86117	14.0007	99.1523					7.5225
	10MS028	3	1.84799	14.1013	1.83945	14.0361	99.5376					7.63059
	10MS029	3	1.86575	14.5045	1.81137	14.0818	97.0855					7.77411
	10MS142	3	1.80906	14.0786	1.80981	14.0844	100.041	OK	1.80906	14.0786	100.041	7.78226
	10MS314	3	1.82327	14.0522	1.82437	14.0606	100.06	OK	1.82327	14.0522	100.06	7.70712
	10MS106	3	1.85306	14.1626	1.83702	14.04	99.1346					7.64283
	10MS285	3	1.85123	14.1919	1.83241	14.0475	98.9831					7.66616
	09MS009	3	1.84985	14.228	1.82745	14.0556	98.7887					7.69141
	09MS010	3	1.83746	14.314	1.80829	14.0868	98.4128					7.79014
	10MS217	3	1.88425	14.4356	1.83339	14.046	97.3005					7.66121
	10MS220	3	1.97651	14.8119	1.867	13.9912	94.4592					7.49394
	10MS183	4	1.82153	14.0047	1.82803	14.0547	100.357	high MI				7.68844
	10MS264	4	1.83222	14.1344	1.82296	14.0629	99.4944					7.71435
	10MS265	4	1.81632	14.0746	1.81623	14.0739	99.995	OK	1.81632	14.0746	99.995	7.74897
	10MS107	4	1.83551	14.0337	1.83646	14.0409	100.052	OK	1.83551	14.0337	100.052	7.64565
	10MS286	4	1.83	14.0253	1.83281	14.0469	100.154	OK	1.83	14.0253	100.154	7.66411
	10MS108	4	1.8276	14.1456	1.81797	14.0711	99.4731					7.73997
	10MS287	4	1.83081	14.0468	1.83118	14.0496	100.02	OK	1.83081	14.0468	100.02	7.67242
	10MS045	4	1.82824	14.5596	1.77557	14.1401	97.1191					7.96372
	10MS044	4	1.86871	14.8797	1.77579	14.1398	95.0275					7.96256
	10MS109	4	1.79036	14.171	1.7846	14.1254	99.6782					7.9152
	10MS288	4	1.78954	14.2203	1.77879	14.1349	99.3994					7.94634
	10MS184	4	1.81372	14.1826	1.80264	14.096	99.3894					7.81965
	10MS266	4	1.80427	14.1637	1.79685	14.1055	99.5887					7.8501
	10MS074	4	1.79373	14.3483	1.76904	14.1508	98.6235					7.99915
	10MS112	4	1.79766	14.1181	1.79619	14.1066	99.9183	OK	1.79766	14.1181	99.9183	7.85359
	10MS292	4	1.79449	14.1169	1.7937	14.1106	99.9557	OK	1.79449	14.1169	99.9557	7.86679
													Coordinates for MI lines
													coords. for MI100 regression
													TiO2	Al2O3
													1.7	14.2633
													2.22987	13.4
													coords. for MI window: low-MI limit
													TiO2	Al2O3
													1.7	14.299
													2.32987	13.2703
													coords. for MIwindow: high-MI limit
													TiO2	Al2O3
													1.7	14.2277
													2.22987	13.3666
													Coordinates for constant Al2O3/TiO2 lines
													coords. for lower Al2O3/TiO2 limit
													TiO2	Al2O3
													2.35796	15.5
													2.07133	13.6158
													coords. for upper Al2O3/TiO2 limit
													TiO2	Al2O3
													1.93771	15.5
													1.76463	14.1155
													Al2O3/TiO2 limits
													min	max
													6.57348	7.99915
